# Supplementary material for: Electrostatic interactions at the five-fold axis alter heparin-binding phenotype and drive enterovirus A71 virulence in mice
Source: PubMed Central journal article supplement (PMC6881073; doi:10.1371/journal.ppat.1007863), 2019-11-15
Supplement: ppat.1007863.s010.pdf [file ppat.1007863.s010.pdf]

**Direct sequencing**

| <b>NCBI</b> | <b>Sample type</b>      | <b>Clinical outcome*</b> | <b>Sequence (VP1-98 + VP1-145)</b> | <b>Reference</b> |
|-------------|-------------------------|--------------------------|------------------------------------|------------------|
| KP691643    | Throat swab             | Mild                     | EE                                 | [1]              |
| KP691644    | Throat swab             | Mild                     | EE                                 |                  |
| KP691645    | Throat swab             | Mild                     | EE                                 |                  |
| KP691646    | Throat swab             | Mild                     | EE                                 |                  |
| KP691647    | Throat swab             | Mild                     | EE                                 |                  |
| KP691648    | Throat swab             | Mild                     | EE                                 |                  |
| KP691649    | Throat swab             | Mild                     | EE                                 |                  |
| KP691650    | Throat swab             | Mild                     | EE                                 |                  |
| KP691651    | Throat swab             | Mild                     | EE                                 |                  |
| KP691652    | Throat swab             | Mild                     | EE                                 |                  |
| KP691653    | Throat swab             | Mild                     | EE                                 |                  |
| KP691654    | Throat swab             | Mild                     | EE                                 |                  |
| KP691655    | Throat swab             | Mild                     | EE                                 |                  |
| KP691656    | Throat swab             | Mild                     | EE                                 |                  |
| KP691657    | Throat swab             | Mild                     | EE                                 |                  |
| KP691658    | Throat swab             | Mild                     | EE                                 |                  |
| KP691659    | Throat swab             | Mild                     | EE                                 |                  |
| KP691660    | Throat swab             | Mild                     | EE                                 |                  |
| KP691661    | Throat swab             | Mild                     | EE                                 |                  |
| KP691662    | Throat swab             | Mild                     | EE                                 |                  |
| KP691663    | Throat swab             | Mild                     | EE                                 |                  |
| KP691664    | Throat swab             | Mild                     | EE                                 |                  |
| KP691665    | Throat swab             | Mild                     | EE                                 |                  |
| KP691666    | Throat swab             | Mild                     | EE                                 |                  |
| JQ419491    | Throat swab             | Mild                     | EE                                 | [2]              |
| JQ419492    | Throat swab             | Mild                     | EE                                 |                  |
| JQ419493    | Throat swab             | Mild                     | KE                                 |                  |
| JQ419494    | Throat swab             | Mild                     | EE                                 |                  |
| JQ419495    | Throat swab             | Mild                     | EE                                 |                  |
| JQ419496    | Throat swab             | Mild                     | EE                                 |                  |
| JQ419497    | Throat swab             | Mild                     | KE                                 |                  |
| JQ419498    | Throat swab             | Mild                     | KE                                 |                  |
| JQ419499    | Throat swab             | Severe                   | EE                                 |                  |
| JQ766195    | Throat swab, fecal swab | Severe                   | EE                                 | [3]              |
| KY796193    | Throat swab             | Mild                     | EE                                 | [4]              |
| KT717067    | Stool sample            | Mild                     | EE                                 | [5]              |
| KT717068    | Stool sample            | Mild                     | EE                                 |                  |
| KJ156339    | Stool sample            | N.D.                     | EE                                 | [6]              |

|          |                          |                |    |      |
|----------|--------------------------|----------------|----|------|
| KJ156340 | Stool sample             |                | EE |      |
| KJ156341 | Stool sample             |                | EE |      |
| KJ156342 | Stool sample             |                | EE |      |
| KJ156343 | Throat swab              |                | EE |      |
| KJ784497 | Throat swab              |                | EE |      |
| KJ784498 | Throat swab              |                | EE |      |
| KJ784499 | Throat swab              |                | EE |      |
| KJ784500 | Throat swab              |                | EE |      |
| KY041858 | Nasal swab               | N.D.           | EE | [7]  |
| KY041859 | Nasal swab               |                | EE |      |
| KY041860 | Nasal swab               |                | EE |      |
| KY041861 | Nasal swab               |                | EE |      |
| KY041862 | Nasal swab               |                | EE |      |
| KY041863 | Nasal swab               |                | EE |      |
| KY041864 | Nasal swab               |                | EE |      |
| KP171496 | Throat swab              | Mild or severe | EE | [8]  |
| KP171497 | Throat swab              |                | EE |      |
| KP171498 | Throat swab              |                | EE |      |
| KP171499 | Throat swab              |                | EE |      |
| KP171500 | Throat swab              |                | EE |      |
| KP171501 | Throat swab              |                | EE |      |
| KP171502 | Throat swab              |                | EE |      |
| KP171503 | Throat swab              |                | EE |      |
| KP171504 | Throat swab              |                | EE |      |
| KP171505 | Throat swab              |                | EE |      |
| KP171506 | Throat swab              |                | EE |      |
| KP171507 | Throat swab              |                | EE |      |
| KP171508 | Throat swab              |                | EE |      |
| KP171509 | Throat swab              |                | EE |      |
| HQ828086 | Intestinal content       | Fatal          | EE | [9]  |
| GQ231934 | Throat swab, rectal swab | Mild           | EE | [10] |
| GQ231935 | Throat swab, rectal swab | Mild           | EE |      |
| GQ231936 | Throat swab, rectal swab | Mild           | EE |      |
| GQ231937 | Throat swab, rectal swab | Severe         | EE |      |
| GQ231939 | Throat swab, rectal swab | Severe         | EE |      |
| GQ231940 | Throat swab, rectal swab | Mild           | EE |      |
| GQ231941 | Throat swab, rectal swab | Severe         | EQ |      |

|          |                          |        |    |      |
|----------|--------------------------|--------|----|------|
| GQ231942 | Throat swab, rectal swab | Severe | EE |      |
| GQ231943 | Throat swab, rectal swab | Severe | EE |      |
| EU414333 | CSF                      | Severe | EE | [11] |
| JX990970 | N.D.                     | N.D.   | EE | [12] |
| JX990971 | N.D.                     |        | EE |      |
| JX990972 | N.D.                     |        | KE |      |
| JX990973 | N.D.                     |        | EE |      |
| JX990974 | N.D.                     |        | EE |      |
| JX990975 | N.D.                     |        | EE |      |
| JX990976 | N.D.                     |        | KE |      |
| JX990977 | N.D.                     |        | KE |      |
| JX990978 | N.D.                     |        | KE |      |
| JX990979 | N.D.                     |        | KE |      |
| JX990980 | N.D.                     |        | KE |      |
| JX990981 | N.D.                     |        | EE |      |
| JX990982 | N.D.                     |        | KE |      |
| JX990983 | N.D.                     |        | EE |      |
| JX990984 | N.D.                     |        | EE |      |
| JX990985 | N.D.                     |        | KE |      |
| JX990986 | N.D.                     |        | EE |      |
| JX990987 | N.D.                     |        | EE |      |
| JX990988 | N.D.                     |        | EE |      |
| JX990989 | N.D.                     |        | KE |      |
| JX990990 | N.D.                     |        | EE |      |
| JX990991 | N.D.                     |        | EE |      |
| JX990992 | N.D.                     |        | EQ |      |
| JX990993 | N.D.                     |        | EE |      |
| JX990994 | N.D.                     |        | EG |      |
| JX990995 | N.D.                     |        | EE |      |
| JX990996 | N.D.                     |        | EE |      |
| JX990997 | N.D.                     |        | EE |      |
| JX990998 | N.D.                     |        | EE |      |
| JX990999 | N.D.                     |        | EE |      |
| JX991000 | N.D.                     | EQ     |    |      |
| JX991001 | N.D.                     | EE     |    |      |
| JX991002 | N.D.                     | EQ     |    |      |
| JX991003 | N.D.                     | EQ     |    |      |
| JX991004 | N.D.                     | EQ     |    |      |
| JX991005 | N.D.                     | EQ     |    |      |
| JX991006 | N.D.                     | EE     |    |      |
| JX991007 | N.D.                     | EE     |    |      |

|          |             |                |    |      |
|----------|-------------|----------------|----|------|
| JX991008 | N.D.        |                | EE |      |
| JX991009 | N.D.        |                | EE |      |
| JX991010 | N.D.        |                | EE |      |
| JX991011 | N.D.        |                | EG |      |
| JX991012 | N.D.        |                | EE |      |
| JX991013 | N.D.        |                | EE |      |
| JX991014 | N.D.        |                | EE |      |
| JX991015 | N.D.        |                | EE |      |
| JX991016 | N.D.        |                | EE |      |
| JX991017 | N.D.        |                | EE |      |
| JX991018 | N.D.        |                | EE |      |
| JX991019 | N.D.        |                | EE |      |
| JX991020 | N.D.        |                | EE |      |
| JX991021 | N.D.        |                | EE |      |
| JX991022 | N.D.        |                | EE |      |
| JX991023 | N.D.        |                | EE |      |
| JX991024 | N.D.        |                | EE |      |
| JX991025 | N.D.        |                | EE |      |
| JX991026 | N.D.        |                | EE |      |
| JX991027 | N.D.        |                | EE |      |
| JX991028 | N.D.        |                | EE |      |
| JX991029 | N.D.        |                | EE |      |
| JX991030 | N.D.        |                | EE |      |
| JX991031 | N.D.        |                | EE |      |
| JX991032 | N.D.        |                | EE |      |
| JX991033 | N.D.        |                | EE |      |
| JX991034 | N.D.        |                | EE |      |
| JX991035 | N.D.        |                | EE |      |
| JX991036 | N.D.        |                | EE |      |
| JX991037 | N.D.        |                | EE |      |
| JX991038 | N.D.        |                | EE |      |
| JX991039 | N.D.        |                | EE |      |
| JX991040 | N.D.        |                | EE |      |
| JX991041 | N.D.        |                | EE |      |
| JX991042 | N.D.        |                | EE |      |
| JN944847 | Throat swab | Mild or severe | EE | [13] |
| JN944848 | Throat swab |                | EE |      |
| JN944849 | Throat swab |                | EE |      |
| JN944850 | Throat swab |                | EE |      |
| JN944851 | Throat swab |                | EE |      |
| JN944852 | Throat swab |                | EE |      |
| JN944853 | Throat swab |                | EE |      |
| JN944854 | Throat swab |                | EE |      |

|          |             |  |    |  |
|----------|-------------|--|----|--|
| JN944855 | Throat swab |  | EE |  |
| JN944856 | Throat swab |  | EE |  |
| JN944857 | Throat swab |  | EE |  |
| JN944858 | Throat swab |  | EE |  |
| JN944859 | Throat swab |  | EE |  |
| JN944860 | Throat swab |  | EE |  |
| JN944861 | Throat swab |  | EE |  |
| JN944862 | Throat swab |  | EE |  |
| JN944863 | Throat swab |  | EE |  |
| JN944864 | Throat swab |  | EE |  |
| JN944865 | Throat swab |  | EE |  |
| JN944866 | Throat swab |  | EE |  |
| JN944867 | Throat swab |  | EE |  |
| JN944868 | Throat swab |  | EE |  |
| JN944869 | Throat swab |  | EE |  |
| JN944870 | Throat swab |  | EE |  |
| JN944871 | Throat swab |  | EE |  |
| JN944872 | Throat swab |  | EE |  |
| JN944873 | Throat swab |  | EE |  |
| JN944874 | Throat swab |  | EE |  |
| JN944875 | Throat swab |  | EE |  |
| JN944876 | Throat swab |  | EE |  |
| JN944877 | Throat swab |  | EE |  |
| JN944878 | Throat swab |  | EE |  |
| JN944879 | Throat swab |  | EE |  |
| JN944880 | Throat swab |  | EE |  |
| JN944881 | Throat swab |  | EE |  |
| JN944882 | Throat swab |  | EE |  |
| JN944883 | Throat swab |  | EE |  |
| JN944884 | Throat swab |  | EE |  |
| JN944885 | Throat swab |  | EE |  |
| JN944886 | Throat swab |  | EE |  |
| JN944887 | Throat swab |  | EE |  |
| JN944888 | Throat swab |  | EE |  |
| JN944889 | Throat swab |  | EE |  |
| JN944890 | Throat swab |  | EE |  |
| JN944891 | Throat swab |  | EE |  |
| JN944892 | Throat swab |  | EE |  |
| JN944893 | Throat swab |  | EE |  |
| JN944894 | Throat swab |  | EE |  |
| JN944895 | Throat swab |  | EE |  |

**Sequencing from cell culture adaptation**

| <b>NCBI</b> | <b>Sample type</b>                                   | <b>Cell</b> | <b>Clinical outcome*</b> | <b>Sequence (VP1-98 + VP1-145)</b> | <b>Reference</b> |
|-------------|------------------------------------------------------|-------------|--------------------------|------------------------------------|------------------|
| MG773122    | Throat swab                                          | RD          | Mild                     | EE                                 | [14]             |
| MG773123    | Throat swab                                          | RD          | Mild                     | EE                                 |                  |
| MG773124    | Throat swab                                          | RD          | Mild                     | EE                                 |                  |
| MG773125    | Throat swab                                          | RD          | Mild                     | EE                                 |                  |
| MG773126    | Throat swab                                          | RD          | Mild                     | EE                                 |                  |
| KX197414    | Throat swab, rectal swab                             | Vero        | Severe                   | EE                                 | [15]             |
| KX197415    | Throat swab, rectal swab                             | Vero        | Severe                   | EE                                 |                  |
| KX197416    | Throat swab, rectal swab                             | Vero        | Severe                   | EE                                 |                  |
| KX197417    | Throat swab, rectal swab                             | Vero        | Severe                   | EE                                 |                  |
| KX197418    | Throat swab, rectal swab                             | Vero        | Mild                     | EE                                 |                  |
| KX197419    | Throat swab, rectal swab                             | Vero        | Mild                     | EE                                 |                  |
| KX197420    | Serum, throat and rectal swabs                       | Vero        | Mild                     | EE                                 |                  |
| KX197421    | Serum and rectal swab / BAL, throat and rectal swabs | Vero        | Severe                   | EE                                 |                  |
| KX197422    | Throat and rectal swabs                              | Vero        | Severe                   | EE                                 |                  |
| KX197455    | Throat and rectal swabs                              | Vero        | Severe                   | EE                                 |                  |
| KX197456    | Throat and rectal swabs                              | Vero        | Mild                     | EE                                 |                  |
| KX197457    | Throat and rectal swabs                              | Vero        | Mild                     | EE                                 |                  |
| KX197458    | Serum, throat and rectal swabs                       | Vero        | Severe                   | EE                                 |                  |
| KX197459    | BAL, throat and rectal swabs                         | Vero        | Mild                     | EE                                 |                  |
| KX197460    | Throat and rectal swabs                              | Vero        | Mild                     | EE                                 |                  |
| KX197461    | CSF, throat and rectal swabs                         | Vero        | Severe                   | EE                                 |                  |

|          |                                                                   |      |        |    |      |
|----------|-------------------------------------------------------------------|------|--------|----|------|
| KX197462 | Throat and rectal swabs                                           | Vero | Severe | EE |      |
| KX197463 | CSF, throat and rectal swabs / Throat swab                        | Vero | Severe | EE |      |
| KX197464 | Serum, throat and rectal swabs                                    | Vero | Severe | EE |      |
| KX197465 | Serum, throat and rectal swabs                                    | Vero | Severe | EE |      |
| EU868611 | Throat swabs, nasal swabs, rectal swabs, saliva, urine, and blood | RD   | Mild   | EE | [16] |
| FJ461781 | Throat swabs, nasal swabs, rectal swabs, saliva, urine, and blood | RD   | Mild   | EE |      |
| FJ461782 | Throat swabs, nasal swabs, rectal swabs, saliva, urine, and blood | RD   | Mild   | EE |      |
| FJ461783 | Throat swabs, nasal swabs, rectal swabs, saliva, urine, and blood | RD   | Mild   | EE |      |
| FJ461784 | Throat swabs, nasal swabs, rectal swabs, saliva, urine, and blood | RD   | Mild   | EE |      |
| FJ461785 | Throat swabs, nasal swabs, rectal swabs, saliva, urine, and blood | RD   | Mild   | EE |      |
| FJ461786 | Throat swabs, nasal swabs, rectal swabs, saliva, urine, and blood | RD   | Mild   | EE |      |
| FJ461787 | Throat swabs, nasal swabs, rectal swabs, saliva, urine, and blood | RD   | Mild   | EE |      |

|          |                                                                               |                       |        |    |      |      |
|----------|-------------------------------------------------------------------------------|-----------------------|--------|----|------|------|
| FJ461788 | Throat swabs,<br>nasal swabs,<br>rectal swabs,<br>saliva, urine, and<br>blood | RD                    | Mild   | EE |      |      |
| FJ461789 | Throat swabs,<br>nasal swabs,<br>rectal swabs,<br>saliva, urine, and<br>blood | RD                    | Mild   | EE |      |      |
| JN835312 | Pharyngeal swab                                                               | BGM                   | Mild   | EE | [17] |      |
| GQ117124 | Throat swab,<br>vesicular fluid                                               | RD                    | Mild   | KE | [18] |      |
| GQ117125 | Throat swab,<br>vesicular fluid                                               | RD                    | Mild   | KE |      |      |
| GQ117126 | Throat swab,<br>vesicular fluid                                               | RD                    | Mild   | KE |      |      |
| GQ117127 | Throat swab,<br>vesicular fluid                                               | RD                    | Mild   | KE |      |      |
| GQ117128 | Throat swab,<br>vesicular fluid                                               | RD                    | Mild   | KE |      |      |
| KU645333 | CSF, throat swab,<br>fecal specimen                                           | RD,<br>MRC-5,<br>FrHK | Severe | EE |      | [19] |
| KU645334 | CSF, throat swab,<br>fecal specimen                                           | RD,<br>MRC-5,<br>FrHK | Severe | EE |      |      |
| KU645335 | CSF, throat swab,<br>fecal specimen                                           | RD,<br>MRC-5,<br>FrHK | Severe | EE |      |      |
| KU645336 | CSF, throat swab,<br>fecal specimen                                           | RD,<br>MRC-5,<br>FrHK | Severe | EE |      |      |
| KU645337 | CSF, throat swab,<br>fecal specimen                                           | RD,<br>MRC-5,<br>FrHK | Severe | EE |      |      |
| KU645338 | CSF, throat swab,<br>fecal specimen                                           | RD,<br>MRC-5,<br>FrHK | Severe | EE |      |      |
| AB213618 | Throat swab,<br>nasal swab                                                    | HEF,<br>GMK           | Mild   | EE | [20] |      |
| AB550333 | Throat swab                                                                   | RD                    | Mild   | EG | [21] |      |
| AB550335 | Rectal swab                                                                   | Vero                  | Fatal  | EG |      |      |
| AB550337 | Stool                                                                         | Vero                  | Fatal  | EG |      |      |
| AB550339 | Nasopharyngeal<br>swab                                                        | RD                    | Mild   | EQ |      |      |
| AB550341 | Stool                                                                         | RD                    | Mild   | EQ |      |      |
| AY207611 | Vesicle swab                                                                  | Vero, RD              | Mild   | EE | [22] |      |



|          |                 |          |             |    |      |
|----------|-----------------|----------|-------------|----|------|
| AY207612 | Vesicle swab    | Vero, RD | Mild        | EE |      |
| AY207613 | Vesicle swab    | Vero, RD | Mild        | EE |      |
| AY207614 | Oral swab       | Vero, RD | Mild        | EE |      |
| AY207615 | Vesicle swab    | Vero, RD | Mild        | EE |      |
| AY207616 | Stool           | Vero, RD | Mild        | EE |      |
| AY207617 | Throat swab     | Vero, RD | Mild        | EE |      |
| AY207618 | Rectal swab     | Vero, RD | Mild        | EE |      |
| AY207619 | Vesicle swab    | Vero, RD | Mild        | EE |      |
| AY207620 | Throat swab     | Vero, RD | Mild        | EE |      |
| AY207621 | Throat swab     | Vero, RD | Mild        | EE |      |
| AY207622 | Rectal swab     | Vero, RD | Mild        | EE |      |
| AY207623 | Rectal swab     | Vero, RD | Mild        | EE |      |
| AY207624 | Throat swab     | Vero, RD | Mild        | EE |      |
| AY207625 | Throat swab     | Vero, RD | Mild        | EE |      |
| AY207626 | Rectal swab     | Vero, RD | Mild        | EE |      |
| AY207627 | Vesicle swab    | Vero, RD | Mild        | EE |      |
| AY207628 | Throat swab     | Vero, RD | Mild        | KE |      |
| AY207629 | Throat swab     | Vero, RD | Mild        | KE |      |
| AY207630 | Throat swab     | Vero, RD | Severe      | KE |      |
| AY207631 | Rectal swab     | Vero, RD | Mild        | KE |      |
| AY207632 | Throat swab     | Vero, RD | Mild        | EE |      |
| AY207633 | Vesicle swab    | Vero, RD | Mild        | EE |      |
| AY207634 | Throat swab     | Vero, RD | Mild        | EE |      |
| AY207635 | Ulcer swab      | Vero, RD | Mild        | EE |      |
| AY207636 | Throat swab     | Vero, RD | Mild        | EG |      |
| AY207637 | Throat swab     | Vero, RD | Mild        | KE |      |
| AY207638 | Throat swab     | Vero, RD | Mild        | KE |      |
| AY207639 | Throat swab     | Vero, RD | Severe      | KE |      |
| AY207640 | Rectal swab     | Vero, RD | Mild        | KE |      |
| AY207641 | Oral swab       | Vero, RD | Mild        | EG |      |
| AY207642 | Cerebellum      | Vero, RD | Severe      | EG |      |
| AY207643 | Spinal cord     | Vero, RD | Severe      | EQ |      |
| AY207644 | Stool           | Vero, RD | Mild        | EG |      |
| AY207645 | Stool           | Vero, RD | Mild        | EG |      |
| AY207646 | Brainstem       | Vero, RD | Severe      | KE |      |
| AY207647 | Stool           | Vero, RD | Mild        | EE |      |
| AY207648 | Spinal cord     | Vero, RD | Severe      | EG |      |
| AY207649 | Left brain      | Vero, RD | Myocarditis | KE |      |
| AY207650 | Rectal swab     | Vero, RD | Mild        | EE |      |
| AY207651 | Stool           | Vero, RD | Mild        | EE |      |
| AY207652 | Rectal swab     | Vero, RD | Severe      | KE |      |
| AY207653 | Vesicle swab    | Vero, RD | Severe      | KE |      |
| HQ129932 | Vesicular fluid | RD       |             | EE | [23] |

|          |                                       |      |                 |    |      |      |
|----------|---------------------------------------|------|-----------------|----|------|------|
| FJ606447 | Vesicular fluid                       | RD   | Mild and severe | EE |      |      |
| FJ606448 | Vesicular fluid                       | RD   |                 | EE |      |      |
| FJ606449 | Vesicular fluid                       | RD   |                 | EE |      |      |
| FJ606450 | Vesicular fluid                       | RD   |                 | EE |      |      |
| JN544418 | Throat swab                           | Vero | Fatal           | EQ | [24] |      |
| AM396587 | CSF, rectal swab, stool               | Vero | Fatal           | KE | [25] |      |
| AM396584 | CSF, rectal swab, stool               | Vero | Mild            | EE |      |      |
| AM396588 | CSF, rectal swab, stool               | Vero | Mild            | EE |      |      |
| AM396586 | CSF, rectal swab and stool            | Vero | Mild            | KE |      |      |
| EU812515 | Throat swab                           | Vero | Mild            | EE | [26] |      |
| FJ439769 | Pharyngeal swab                       | RD   | Mild            | EE | [27] |      |
| FJ828519 | Stool                                 | N.D. | Mild            | EE | [28] |      |
| JN256059 | Vesicular swab, throat swab and stool | RD   | Mild            | KE | [29] |      |
| JN256060 | Vesicular swab, throat swab and stool | RD   | Mild            | EE |      |      |
| JN256061 | Vesicular swab, throat swab and stool | RD   | Mild            | EE |      |      |
| JN256062 | Vesicular swab, throat swab and stool | RD   | Mild            | EE |      |      |
| JN256063 | Vesicular swab, throat swab and stool | RD   | Mild            | EE |      |      |
| JN256064 | Vesicular swab, throat swab and stool | RD   | Mild            | EE |      |      |
| JN256065 | Vesicular swab, throat swab and stool | RD   | Mild            | EE |      |      |
| JN256066 | Vesicular swab, throat swab and stool | RD   | Mild            | EE |      |      |
| JN256067 | Vesicular swab, throat swab and stool | RD   | Mild            | EE |      |      |
| JN256068 | Vesicular swab, throat swab and stool | RD   | Mild            | EE |      |      |
| HM037792 | Feces                                 | RD   | Fatal           | EE |      | [30] |
| HM037793 | Feces                                 | RD   | Mild            | EE |      |      |

|          |                                                  |          |                |        |      |      |
|----------|--------------------------------------------------|----------|----------------|--------|------|------|
| HM037794 | Feces                                            | RD       | Severe         | EE     |      |      |
| HM037795 | Rectal swab                                      | RD       | Severe         | EE     |      |      |
| HM037796 | Feces                                            | RD       | Severe         | EE     |      |      |
| HM037797 | Feces                                            | RD       | Mild           | EE     |      |      |
| HM037798 | Vesicle fluid                                    | RD       | Mild           | EE     |      |      |
| HM037799 | Rectal swab                                      | RD       | Mild           | EE     |      |      |
| HM037800 | Feces                                            | RD       | Fatal          | EG     |      |      |
| HM037801 | Throat swab                                      | RD       | Severe         | EE     |      |      |
| HM037802 | Feces                                            | RD       | Mild           | KE     |      |      |
| HM037803 | Rectal swab                                      | RD       | Severe         | EQ     |      |      |
| HM037804 | Feces                                            | RD       | Severe         | EE     |      |      |
| HM037805 | Throat swab                                      | RD       | Severe         | EE     |      |      |
| HM037806 | Feces                                            | RD       | Mild           | EK     |      |      |
| HM037807 | Feces                                            | RD       | Fatal          | EE     |      |      |
| HM037808 | Throat swab                                      | RD       | Fatal          | EE     |      |      |
| GU196833 | Anal swab                                        | Vero, RD | Mild           | KE     |      | [31] |
| GQ994992 | Anal swab                                        | Vero, RD | Mild           | KE     |      |      |
| GQ994989 | Stool                                            | Vero, RD | Mild           | KE     |      |      |
| GQ994990 | Stool                                            | Vero, RD | Mild           | KE     |      |      |
| GQ994991 | Anal swab                                        | Vero, RD | Mild           | KE     |      |      |
| GQ994988 | Throat swab                                      | Vero, RD | Mild           | KE     |      |      |
| DQ341354 | Vesicle, throat swab, rectal swab, stool and CSF | N.D.     | Mild or severe | EQ     | [32] |      |
| DQ341358 | Vesicle, throat swab, rectal swab, stool and CSF | N.D.     |                | EE     |      |      |
| DQ341359 | Vesicle, throat swab, rectal swab, stool and CSF | N.D.     |                | EE     |      |      |
| DQ341361 | Vesicle, throat swab, rectal swab, stool and CSF | N.D.     |                | EE     |      |      |
| DQ341364 | Vesicle, throat swab, rectal swab, stool and CSF | N.D.     |                | EE     |      |      |
| DQ452074 | Vesicle, throat swab, rectal swab, stool and CSF | N.D.     |                | EE     |      |      |
| AF376065 | CSF                                              | N.D.     |                | Severe |      | EE   |

|          |                         |      |        |    |      |      |
|----------|-------------------------|------|--------|----|------|------|
| AF376105 | Stool                   | N.D. | Severe | EG |      |      |
| AF376106 | CSF                     | N.D. | Severe | KE |      |      |
| AF376109 | CSF                     | N.D. | Severe | KE |      |      |
| AF376110 | CSF                     | N.D. | Severe | KE |      |      |
| AF376111 | N.D.                    | N.D. | N.D.   | EQ |      |      |
| AF376116 | Stool                   | N.D. | Severe | EG |      |      |
| AF376125 | Throat swab             | N.D. | Severe | EG |      |      |
| JX244182 | Stool                   | RD   | Mild   | EG |      | [33] |
| JX244183 | Stool                   | RD   | Mild   | EG |      |      |
| JX244184 | Stool                   | RD   | Mild   | EE |      |      |
| JX244185 | Stool                   | RD   | Severe | EE |      |      |
| JX244186 | Anal swab               | RD   | Fatal  | KE |      |      |
| JX244187 | Anal swab               | RD   | Severe | KQ |      |      |
| KC436265 | Stool                   | RD   | Mild   | EE | [34] |      |
| KC436266 | Stool                   | RD   | Mild   | EE |      |      |
| KC436267 | Stool                   | RD   | Mild   | EE |      |      |
| KC436268 | Stool                   | RD   | Mild   | EE |      |      |
| KC436269 | Rectal swab             | RD   | Mild   | EE |      |      |
| KC436270 | Stool                   | RD   | Mild   | EE |      |      |
| KC436271 | Stool                   | RD   | Mild   | EE |      |      |
| KC436272 | Stool                   | RD   | Mild   | EE |      |      |
| KC436273 | Stool                   | RD   | Mild   | EE |      |      |
| KC436274 | Throat swab             | RD   | Mild   | EE |      |      |
| KC436275 | Stool                   | RD   | Mild   | EE |      |      |
| KC436276 | Stool                   | RD   | Mild   | EE |      |      |
| KC436277 | Stool                   | RD   | Mild   | EE |      |      |
| KC436278 | Stool                   | RD   | Mild   | EE |      |      |
| KC436279 | Throat swab             | RD   | Mild   | EE |      |      |
| KC436280 | Stool                   | RD   | Mild   | EE |      |      |
| KC436281 | Stool                   | RD   | Mild   | EE |      |      |
| KC436282 | Stool                   | RD   | Mild   | EE |      |      |
| KC436283 | Stool                   | RD   | Mild   | EE |      |      |
| KC436284 | Nasopharyngeal aspirate | RD   | Mild   | EE |      |      |
| KC436285 | Stool                   | RD   | Mild   | EE |      |      |
| KC436286 | Nasopharyngeal aspirate | RD   | Mild   | EE |      |      |
| AF009523 | N.D.                    | RD   | Severe | EE |      | [35] |
| AF009525 | N.D.                    | RD   | Severe | EE |      |      |
| AF009526 | N.D.                    | RD   | Severe | EQ |      |      |
| AF009527 | N.D.                    | RD   | Severe | EG |      |      |
| AF009539 | N.D.                    | RD   | Severe | EE |      |      |
| AF009542 | N.D.                    | RD   | Severe | EE |      |      |

|          |      |    |        |    |
|----------|------|----|--------|----|
| AF009546 | N.D. | RD | Severe | EE |
| AF009549 | N.D. | RD | Severe | EE |
| AF135883 | N.D. | RD | Severe | EE |
| AF135884 | N.D. | RD | Severe | EE |
| AF135885 | N.D. | RD | Severe | EE |
| AF135886 | N.D. | RD | Severe | EE |
| AF135893 | N.D. | RD | Severe | EG |
| AF135895 | N.D. | RD | Severe | KE |
| AF135899 | N.D. | RD | Severe | EE |
| AF135938 | N.D. | RD | Severe | EQ |
| AF135940 | N.D. | RD | Severe | EA |
| AF135948 | N.D. | RD | Severe | EE |
| AF135950 | N.D. | RD | Severe | EE |

\*N.D. indicates not determined.

## **References**

1. Tan le V, Tuyen NT, Thanh TT, Ngan TT, Van HM, Sabanathan S, et al. A generic assay for whole-genome amplification and deep sequencing of enterovirus A71. *J Virol Methods*. 2015;215-216:30-6. Epub 2015/02/24. doi: 10.1016/j.jviromet.2015.02.011. PubMed PMID: 25704598; PubMed Central PMCID: PMC4374682.
2. Liu Y, Fu C, Wu S, Chen X, Shi Y, Zhou B, et al. A novel finding for enterovirus virulence from the capsid protein VP1 of EV71 circulating in mainland China. *Virus Genes*. 2014;48(2):260-72. Epub 2014/01/21. doi: 10.1007/s11262-014-1035-2. PubMed PMID: 24442718.
3. Li J, Huo X, Dai Y, Yang Z, Lei Y, Jiang Y, et al. Evidences for intertypic and intratypic recombinant events in EV71 of hand, foot and mouth disease during an epidemic in Hubei Province, China, 2011. *Virus Res*. 2012;169(1):195-202. Epub 2012/08/28. doi: 10.1016/j.virusres.2012.07.028. PubMed PMID: 22922556.
4. Ganorkar NN, Patil PR, Tikute SS, Gopalkrishna V. Genetic characterization of enterovirus strains identified in Hand, Foot and Mouth Disease (HFMD): Emergence of B1c, C1 subgenotypes, E2 sublineage of CVA16, EV71 and CVA6 strains in India. *Infect Genet Evol*. 2017;54:192-9. Epub 2017/06/05. doi: 10.1016/j.meegid.2017.05.024. PubMed PMID: 28577914.
5. Faleye TO, Adewumi MO, Coker BA, Nudamajo FY, Adeniji JA. Direct detection and identification of enteroviruses from faeces of healthy Nigerian children using a cell-culture independent RT-nested PCR assay. *Adv Virol*. 2016;2016:1412838. Epub 2016/04/19. doi: 10.1155/2016/1412838. PubMed PMID: 27087810; PubMed Central PMCID: PMC4818813.
6. Chen JF, Zhang RS, Ou XH, Chen FM, Sun BC. The role of enterovirus 71 and coxsackievirus A strains in a large outbreak of hand, foot, and mouth disease in 2012 in Changsha, China. *Int J Infect Dis*. 2014;28:17-25. Epub 2014/09/23. doi: 10.1016/j.ijid.2014.07.024. PubMed PMID: 25236389.
7. Wiyatno A, Hartoyo E, Jaya UA, Ma'roef CN, Khin Saw M, Gillis A, et al. Detection and genetic characterization of human enterovirus A71 from hand, foot and mouth disease cases in Banjarmasin, Indonesia. *Southeast Asian Journal of Tropical Medicine and Public Health*. 2018;49(5):820-5.
8. Zhou X, Zhu Q, Xia W, He F, Hu M, Ni X, et al. Molecular epidemiology of an outbreak of hand, foot, and mouth disease associated with subgenotype C4a of enterovirus A71 in Nanchang,

China in 2014. *J Med Virol.* 2015;87(12):2154-8. Epub 2015/06/11. doi: 10.1002/jmv.24288. PubMed PMID: 26058813.

9. Zhang YC, Jiang SW, Gu WZ, Hu AR, Lu CT, Liang XY, et al. Clinicopathologic features and molecular analysis of enterovirus 71 infection: report of an autopsy case from the epidemic of hand, foot and mouth disease in China. *Pathol Int.* 2012;62(8):565-70. Epub 2012/07/26. doi: 10.1111/j.1440-1827.2012.02837.x. PubMed PMID: 22827767.

10. Chang SC, Li WC, Chen GW, Tsao KC, Huang CG, Huang YC, et al. Genetic characterization of enterovirus 71 isolated from patients with severe disease by comparative analysis of complete genomes. *J Med Virol.* 2012;84(6):931-9. Epub 2012/04/14. doi: 10.1002/jmv.23287. PubMed PMID: 22499017.

11. Cordey S, Petty TJ, Schibler M, Martinez Y, Gerlach D, van Belle S, et al. Identification of site-specific adaptations conferring increased neural cell tropism during human enterovirus 71 infection. *PLoS Pathog.* 2012;8(7):e1002826. Epub 2012/08/23. doi: 10.1371/journal.ppat.1002826. PubMed PMID: 22910880; PubMed Central PMCID: PMC3406088.

12. Wu WH, Kuo TC, Lin YT, Huang SW, Liu HF, Wang J, et al. Molecular epidemiology of enterovirus 71 infection in the central region of Taiwan from 2002 to 2012. *PLoS One.* 2013;8(12):e83711. Epub 2014/01/07. doi: 10.1371/journal.pone.0083711. PubMed PMID: 24391812; PubMed Central PMCID: PMC3877097.

13. Jiang B, Zhang J, You X, Dong C, Cheng X, Dai X, et al. Diagnosis of hand, foot, and mouth disease caused by EV71 and other enteroviruses by a one-step, single tube, duplex RT-PCR. *J Med Virol.* 2012;84(11):1803-8. Epub 2012/09/22. doi: 10.1002/jmv.23391. PubMed PMID: 22997084.

14. Xu J, Wang F, Zhao D, Liu J, Su H, Wang B. Sequence analysis-based characterization and identification of neurovirulence-associated variants of 36 EV71 strains from China. *J Med Virol.* 2018;90(8):1310-7. Epub 2018/04/01. doi: 10.1002/jmv.25081. PubMed PMID: 29603282.

15. Duong V, Mey C, Eloit M, Zhu H, Danet L, Huang Z, et al. Molecular epidemiology of human enterovirus 71 at the origin of an epidemic of fatal hand, foot and mouth disease cases in Cambodia. *Emerg Microbes Infect.* 2016;5(9):e104. Epub 2016/09/22. doi: 10.1038/emi.2016.101. PubMed PMID: 27651091; PubMed Central PMCID: PMC5113052.

16. Wu Y, Yeo A, Phoon MC, Tan EL, Poh CL, Quak SH, et al. The largest outbreak of hand; foot and mouth disease in Singapore in 2008: the role of enterovirus 71 and coxsackievirus A strains. *Int J Infect Dis.* 2010;14(12):e1076-81. Epub 2010/10/19. doi: 10.1016/j.ijid.2010.07.006. PubMed PMID: 20952237.

17. Tan CY, Gonfrier G, Ninove L, Zandotti C, Dubot-Peres A, de Lamballerie X, et al. Screening and detection of human enterovirus 71 infection by a real-time RT-PCR assay in Marseille, France, 2009-2011. *Clin Microbiol Infect.* 2012;18(4):E77-80. Epub 2012/02/16. doi: 10.1111/j.1469-0691.2012.03769.x. PubMed PMID: 22332991.

18. Yu H, Chen W, Chang H, Tang R, Zhao J, Gan L, et al. Genetic analysis of the VP1 region of enterovirus 71 reveals the emergence of genotype A in central China in 2008. *Virus Genes.* 2010;41(1):1-4. Epub 2010/03/23. doi: 10.1007/s11262-010-0472-9. PubMed PMID: 20306124.

19. Guerra JA, Waters A, Kelly A, Morley U, O'Reilly P, O'Kelly E, et al. Seroepidemiological and phylogenetic characterization of neurotropic enteroviruses in Ireland, 2005-2014. *J Med Virol.* 2017;89(9):1550-8. Epub 2017/01/11. doi: 10.1002/jmv.24765. PubMed PMID: 28071799.

20. Mizuta K, Abiko C, Murata T, Matsuzaki Y, Itagaki T, Sanjoh K, et al. Frequent importation of enterovirus 71 from surrounding countries into the local community of Yamagata, Japan, between 1998 and 2003. *J Clin Microbiol.* 2005;43(12):6171-5. Epub 2005/12/08. doi: 10.1128/jcm.43.12.6171-6175.2005. PubMed PMID: 16333123; PubMed Central PMCID: PMC1317214.

21. Miyamura K, Nishimura Y, Abo M, Wakita T, Shimizu H. Adaptive mutations in the genomes of enterovirus 71 strains following infection of mouse cells expressing human P-selectin glycoprotein ligand-1. *J Gen Virol.* 2011;92(Pt 2):287-91. Epub 2010/10/15. doi: 10.1099/vir.0.022418-0. PubMed PMID: 20943886; PubMed Central PMCID: PMC3081077.

22. Herrero LJ, Lee CS, Hurrelbrink RJ, Chua BH, Chua KB, McMinn PC. Molecular epidemiology of enterovirus 71 in peninsular Malaysia, 1997-2000. *Arch Virol.* 2003;148(7):1369-85. Epub 2003/06/27. doi: 10.1007/s00705-003-0100-2. PubMed PMID: 12827466.
23. Li R, Zou Q, Chen L, Zhang H, Wang Y. Molecular analysis of virulent determinants of enterovirus 71. *PLoS One.* 2011;6(10):e26237. Epub 2011/11/01. doi: 10.1371/journal.pone.0026237. PubMed PMID: 22039449; PubMed Central PMCID: PMC3198388.
24. Huang SW, Wang YF, Yu CK, Su IJ, Wang JR. Mutations in VP2 and VP1 capsid proteins increase infectivity and mouse lethality of enterovirus 71 by virus binding and RNA accumulation enhancement. *Virology.* 2012;422(1):132-43. Epub 2011/11/15. doi: 10.1016/j.virol.2011.10.015. PubMed PMID: 22078110.
25. AbuBakar S, Chee HY, Al-Kobaisi MF, Xiaoshan J, Chua KB, Lam SK. Identification of enterovirus 71 isolates from an outbreak of hand, foot and mouth disease (HFMD) with fatal cases of encephalomyelitis in Malaysia. *Virus Res.* 1999;61(1):1-9. Epub 1999/07/30. PubMed PMID: 10426204.
26. Wang LC, Tang SQ, Li YM, Zhao HL, Dong CH, Cui PF, et al. A comparison of the biological characteristics of EV71 C4 subtypes from different epidemic strains. *Viol Sin.* 2010;25(2):98-106. Epub 2010/10/21. doi: 10.1007/s12250-010-3102-8. PubMed PMID: 20960306.
27. Wu Z, Yang F, Zhao R, Zhao L, Guo D, Jin Q. Identification of small interfering RNAs which inhibit the replication of several Enterovirus 71 strains in China. *J Virol Methods.* 2009;159(2):233-8. Epub 2009/06/06. doi: 10.1016/j.jviromet.2009.04.002. PubMed PMID: 19490979.
28. Mao Q, Dong C, Li X, Gao Q, Guo Z, Yao X, et al. Comparative analysis of the immunogenicity and protective effects of inactivated EV71 vaccines in mice. *PLoS One.* 2012;7(9):e46043. Epub 2012/10/03. doi: 10.1371/journal.pone.0046043. PubMed PMID: 23029378; PubMed Central PMCID: PMC3460965.
29. Zhang Y, Wang J, Guo W, Wang H, Zhu S, Wang D, et al. Emergence and transmission pathways of rapidly evolving evolutionary branch C4a strains of human enterovirus 71 in the Central Plain of China. *PLoS One.* 2011;6(11):e27895. Epub 2011/11/30. doi: 10.1371/journal.pone.0027895. PubMed PMID: 22125635; PubMed Central PMCID: PMC3220707.
30. Sun LM, Zheng HY, Zheng HZ, Guo X, He JF, Guan DW, et al. An enterovirus 71 epidemic in Guangdong Province of China, 2008: epidemiological, clinical, and virogenic manifestations. *Jpn J Infect Dis.* 2011;64(1):13-8. Epub 2011/01/27. PubMed PMID: 21266750.
31. Chang GH, Lin L, Luo YJ, Cai LJ, Wu XY, Xu HM, et al. Sequence analysis of six enterovirus 71 strains with different virulences in humans. *Virus Res.* 2010;151(1):66-73. Epub 2010/04/20. doi: 10.1016/j.virusres.2010.04.001. PubMed PMID: 20398708.
32. McMinn P, Lindsay K, Perera D, Chan HM, Chan KP, Cardoso MJ. Phylogenetic analysis of enterovirus 71 strains isolated during linked epidemics in Malaysia, Singapore, and Western Australia. *J Virol.* 2001;75(16):7732-8. Epub 2001/07/20. doi: 10.1128/jvi.75.16.7732-7738.2001. PubMed PMID: 11462047; PubMed Central PMCID: PMC115010.
33. Wen HL, Si LY, Yuan XJ, Hao SB, Gao F, Chu FL, et al. Complete genome sequencing and analysis of six enterovirus 71 strains with different clinical phenotypes. *Viol J.* 2013;10:115. Epub 2013/04/13. doi: 10.1186/1743-422x-10-115. PubMed PMID: 23577963; PubMed Central PMCID: PMC3669102.
34. Yip CC, Lau SK, Lo JY, Chan KH, Woo PC, Yuen KY. Genetic characterization of EV71 isolates from 2004 to 2010 reveals predominance and persistent circulation of the newly proposed genotype D and recent emergence of a distinct lineage of subgenotype C2 in Hong Kong. *Viol J.* 2013;10:222. Epub 2013/07/05. doi: 10.1186/1743-422x-10-222. PubMed PMID: 23822185; PubMed Central PMCID: PMC3716818.
35. Brown BA, Oberste MS, Alexander JP, Jr., Kennett ML, Pallansch MA. Molecular epidemiology and evolution of enterovirus 71 strains isolated from 1970 to 1998. *J Virol.*

1999;73(12):9969-75. Epub 1999/11/13. PubMed PMID: 10559310; PubMed Central PMCID: PMCPMC113047.
